# Supplementary material for: Non-Proteinuric Preeclampsia: Prevalence, Factors Associated and End-Organ Dysfunction at Mbarara Regional Referral Hospital in Southwestern Uganda&nbsp;&nbsp;
Source: Research Square preprint supplement (doi:10.21203/rs.3.rs-242190/v1), 2021-03-01
Supplement: Supplementary file 1 [file cd027a1cbb8aad176b9fdbbb.pdf]

**QUESTIONNAIRE****NONPROTEINURIC PREECLAMPSIA STUDY**Today's Date: \_\_\_\_/\_\_\_\_/\_\_\_\_  
day month yearParticipant Initials: \_\_\_\_/\_\_\_\_  
Last FirstHospital ID: \_\_\_\_\_  
Study ID: \_\_\_\_\_

| Sociodemographic and lifestyle data       |  |           |          |           |               |                        |  |            |        |         |       |
|-------------------------------------------|--|-----------|----------|-----------|---------------|------------------------|--|------------|--------|---------|-------|
| How old are you (in completed years)?     |  |           |          |           |               | What is your tribe?    |  | Munyankole | Mukiga | Muganda | Other |
| Your highest level of education attained? |  | None      | Primary  | Secondary | Tertiary      | What is your religion? |  | Christian  | Moslem | Other   |       |
| What is your marital status?              |  | Single    | Married  | Widowed   | Divorced      | Has ever smoked?       |  |            |        | Yes     | No    |
| What is your occupation?                  |  | Housewife | Business | Student   | Civil servant | History of alcohol use |  |            |        | Yes     | No    |
| Her district of residence is?             |  |           |          |           |               | Her nationality is?    |  |            |        |         |       |

| Obstetric and medical data                                                             |  |    |          |                 |                |                                                                  |                       |           |                     |                                  |            |           |    |
|----------------------------------------------------------------------------------------|--|----|----------|-----------------|----------------|------------------------------------------------------------------|-----------------------|-----------|---------------------|----------------------------------|------------|-----------|----|
| How many pregnancies have you ever had including this current pregnancy?               |  |    |          |                 |                | Ever diagnosed with Preeclampsia before?                         |                       |           |                     | Yes                              | No         |           |    |
| Parity: how many pregnancies have you ever carried beyond 7 months excluding this one? |  |    |          |                 | --             | Has history/current antihypertensive drugs? If yes tick one/more |                       | NO        | Nifedipine          | Magnesium sulfate                | Methyldopa | Labetalol |    |
| Estimated Gestational age in weeks today                                               |  |    |          |                 |                | Today's blood pressure (mmHg)                                    |                       | _ / _     | Today's weight (Kg) |                                  | _ . _      |           |    |
| Has symptoms of preeclampsia? If yes tick one/more                                     |  | NO | Headache | Epigastric pain | Blurred vision | Convulsions or Coma                                              | Today's height (M)    |           | _ . _               | History of Chronic Liver Disease |            | Yes       | No |
|                                                                                        |  |    |          |                 |                |                                                                  | ANC Booking BP (mmHg) |           | _ / _               | History of Chronic hypertension  |            | Yes       | No |
| How many ANC visits are recorded?                                                      |  |    | None     | 1-3             | Above 4        | Number of fetus in this pregnancy is?                            |                       | Singleton |                     | Multiple                         |            |           |    |
| History of Chronic kidney disease                                                      |  |    |          | Yes             | No             | Has she ever been diagnosed with diabetes?                       |                       |           |                     | Yes                              | No         |           |    |

| Laboratory data          |  |       |                     |    |       |                             |  |          |                                      |          |       |    |
|--------------------------|--|-------|---------------------|----|-------|-----------------------------|--|----------|--------------------------------------|----------|-------|----|
| Urine protein            |  | Trace | 1+                  | 2+ | 3+    | AST (IU/L)                  |  | _ . _    | ALT (IU/L)                           |          | _ . _ |    |
| Hemoglobin (g/dL)        |  | _ . _ | Platelets /ul '000s |    | _____ | HIV serology/ EMTCT code    |  | Positive |                                      | Negative |       |    |
| Serum creatinine (mg/dL) |  | _ . _ | Serum Urea (mg/dL)  |    | _____ | Random blood sugar (mmol/L) |  | _ . _    | Positive leucocyte esterase /nitrite |          | Yes   | No |

Name of study staff completing the questionnaire \_\_\_\_\_ Date: \_\_\_\_\_ 1st data Entry \_\_\_\_/\_\_\_\_/\_\_\_\_ 2nd data entry \_\_\_\_/\_\_\_\_/\_\_\_\_
